# Supplementary material for: β-Aminobutyric Acid Effectively Postpones Senescence of Strawberry Fruit by Regulating Metabolism of NO, H2S, Ascorbic Acid, and ABA
Source: MDPI journal article supplement (doi:10.3390/horticulturae10030218), 2024-02-24
Supplement: s1 [file s1]

**Table. S1 Primer sequences for gene expression in qRT-PCR analysis**

| <b>Genes</b>      | <b>Primer forward (5'–3')</b> | <b>Primer reverse (5'–3')</b> |
|-------------------|-------------------------------|-------------------------------|
| <i>FaPG</i>       | ACATTACGGACACG AACAT          | TGGTAGCACAAGCAAGAG            |
| <i>FaPME</i>      | ATTATGCTCAGTGTGGAAGT          | CAAGGTATGTAGGTGTGCTA          |
| <i>FaACS</i>      | GGCCAGGACTCGTCTTACTT          | GCTCGCCGAAAATGGATTCT          |
| <i>FaACO</i>      | ACAGAGTGATTGCCCAGACA          | TGGAAGTTGAGGCCTGCATA          |
| <i>FaAPX</i>      | CCATCGCTAGGGTTTTGACCT         | TGAGCTTCCTCTTGGCCTTG          |
| <i>FaMDR</i>      | GCTGCATATCCGGCAGAGAC          | CATCGCCTTCTCTCACCAGC          |
| <i>FaDDR</i>      | CTCCTCCTCCGACCATCTCA          | GTGATGGAGGACTTGACGCA          |
| <i>FaNCED</i>     | GCCAACCCTTTACACGA             | TCCCGATTTCACGCTCC             |
| <i>FaAAO</i>      | GGATTTAGGACAGATAGAAGGTGCT     | TGCCATCGGAAACCACCA            |
| <i>Fa18S-rRNA</i> | AGCAAGCCTACGCTCTGG            | GGTGCCCTTCCGTCAATT            |

The sequences of *FaPG*, *FaPME*, *FaMDR*, *FaDDR* and *Fa18S-rRNA* were obtained according to NCBI database. The sequences of *FaACS* and *FaACO* were applied based on the information of Qian et al. (2016). The sequence of *FaAPX* were applied based on the information of Li et al. (2019). The sequences of *FaNCED* and *FaAAO* were applied based on the information of Perin et al. (2019).

#### Reference:

- 1 Perin, E.C., da Silva Messias, R., Borowski, J.M., Crizel, R.L., Schott, I.B., Carvalho, I.R., Rombaldi C.V., Galli, V., 2019). ABA-dependent salt and drought stress improve strawberry fruit quality. Food Chem. 271, 516–526. <https://doi.org/10.1016/j.foodchem.2018.07.213>.
- 2 Li, D., Zhang, X., Li, L., Aghdam, M.S., Wei, X., Liu, J., Xu, Y., Luo, Z., 2019. Elevated CO<sub>2</sub> delayed the chlorophyll degradation and anthocyanin accumulation in postharvest strawberry fruit. Food Chem. 285, 163-170. <https://doi.org/10.1016/j.foodchem.2019.01.150>.
- 3 Qian, M., Baoju, W., Xiangpeng, L., Xin, S., Lingfei, S., Haifeng, J., Jinggui, F.,

2016. Comparison and verification of the genes involved in ethylene biosynthesis and signaling in apple, grape, peach, pear and strawberry. *Acta Physiol. Plant.* 38, 44.  
<https://doi.org/10.1007/s11738-016-2067-0>.
